# Supplementary material for: Historical biogeography, systematics, and integrative taxonomy of the non-Ethiopian speckled pelage brush-furred rats (Lophuromys flavopunctatus group)
Source: Springer Nature journal article supplement (doi:10.1186/s12862-021-01813-w), 2021-05-19

**Fig. S1** The phylogeny of the genus *Lophuromys* inferred from the *Cytochrome b* gene using Bayesian Inference in MrBayes. There were a total of 238 sequences in the analysis, representing all unique haplotypes from the initial alignment of 803 sequences. The numbers above branches represent the % posterior probability values <95%.

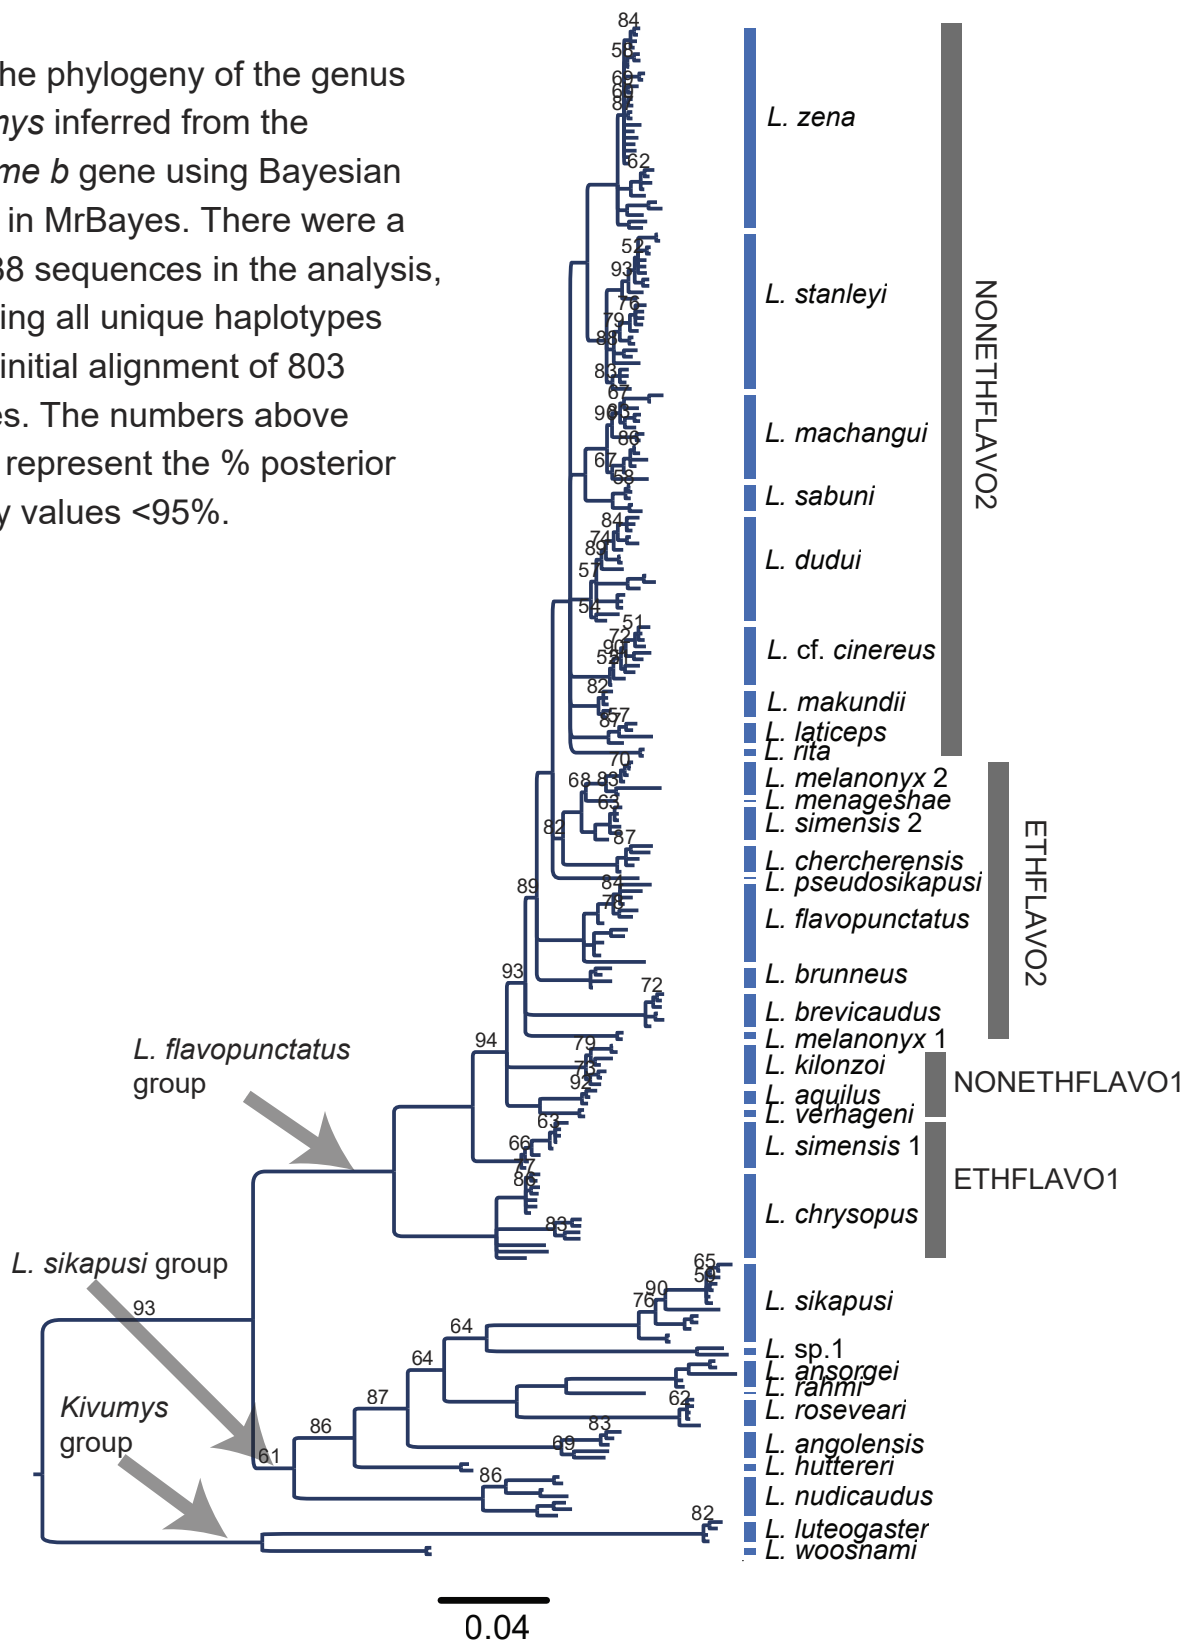

**Fig. S2** Map showing the type localities (red, green outlined crosses '+') of species described under the non-Ethiopian *flavopunctatus* group, with the corresponding species names labeled in red fonts. The sampling points of samples used in the study are also shown, outlined to illustrate their distribution extents.

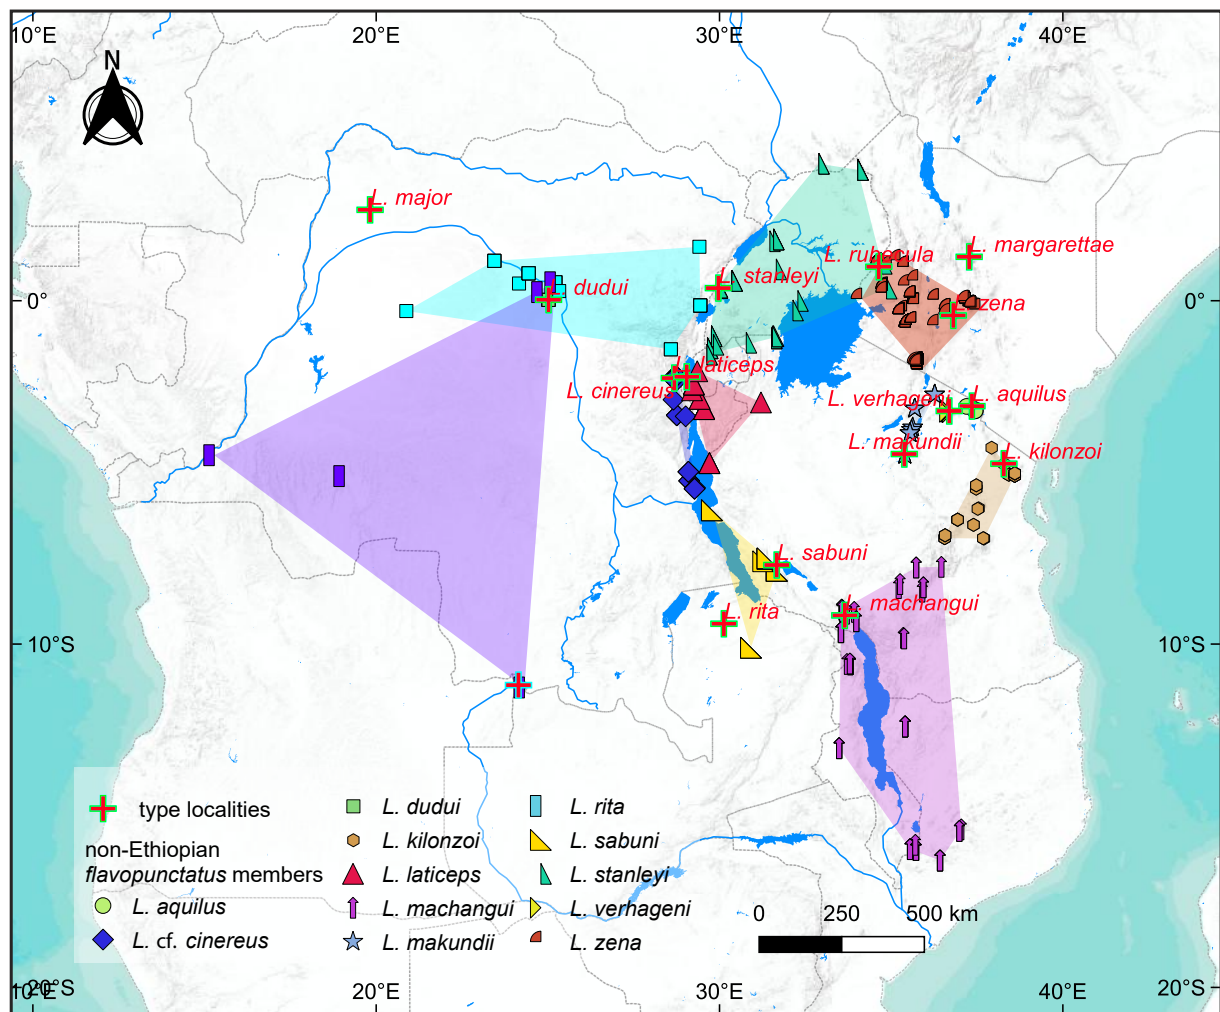



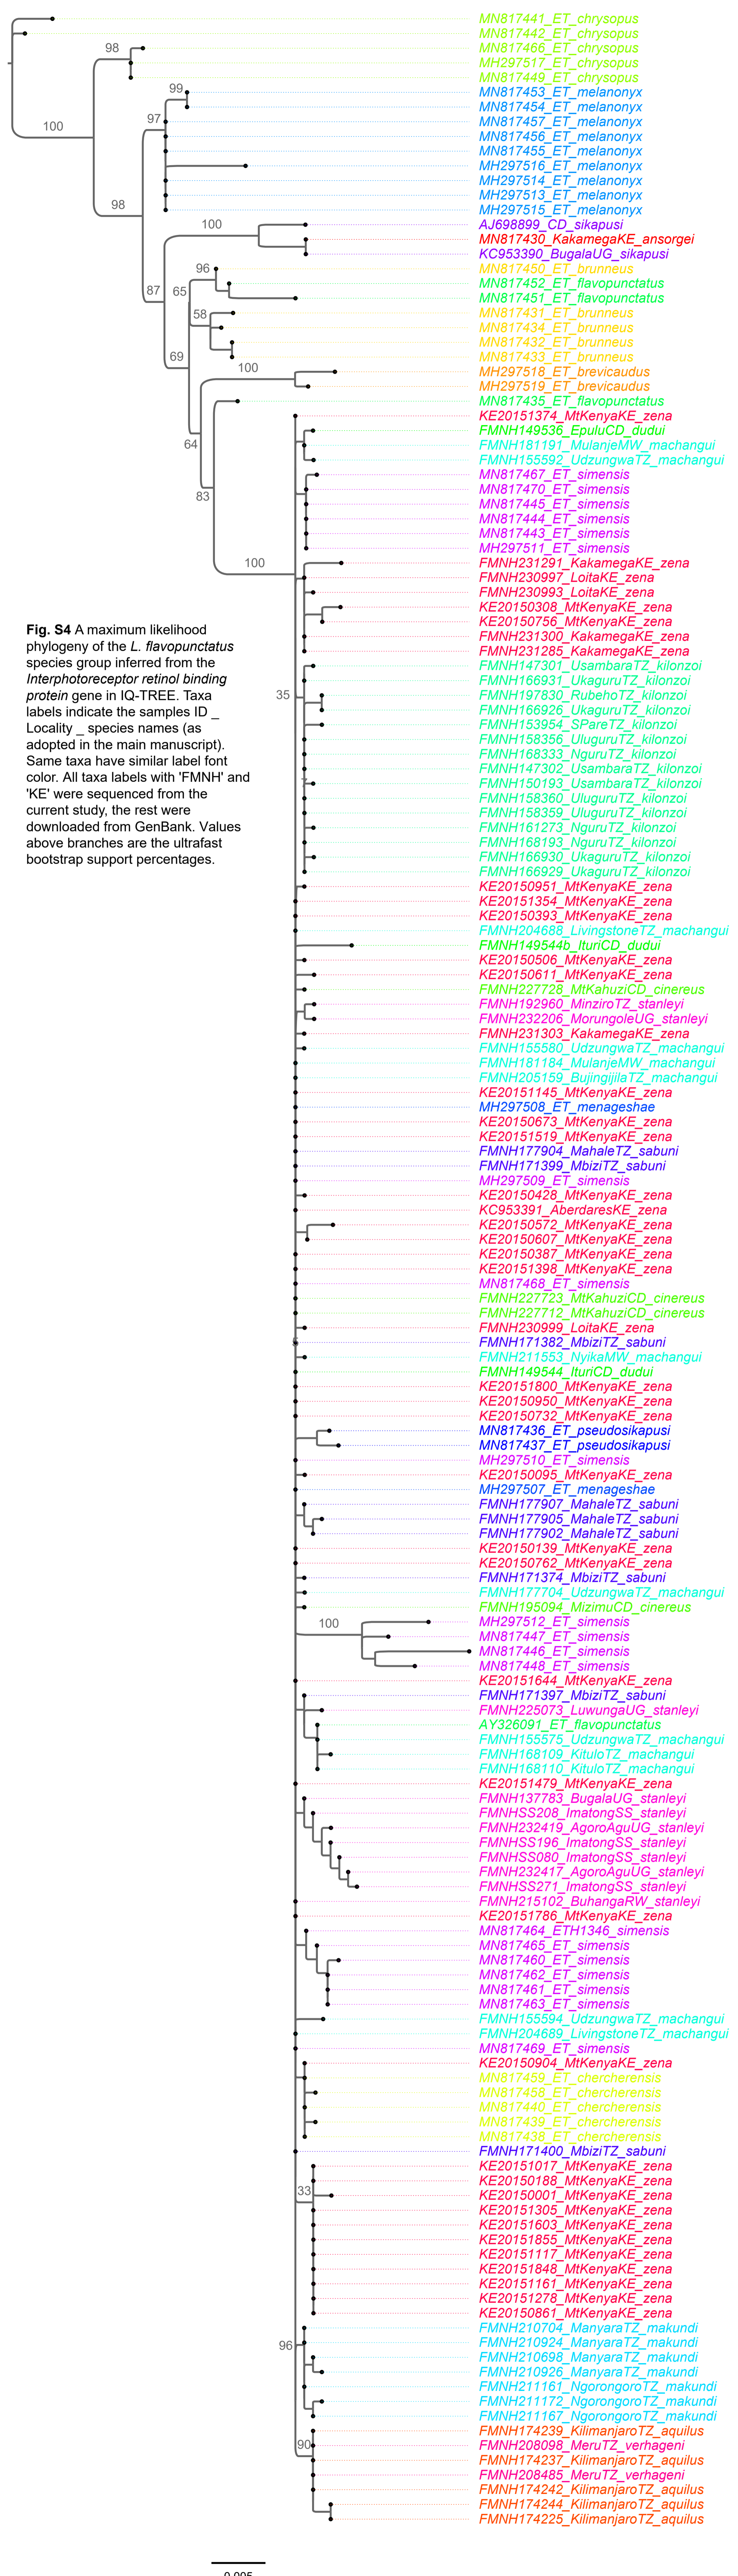

MN817441\_ET\_chrysopus  
 MN817442\_ET\_chrysopus  
 MN817466\_ET\_chrysopus  
 MH297517\_ET\_chrysopus  
 MN817449\_ET\_chrysopus  
 MN817453\_ET\_melanonyx  
 MN817454\_ET\_melanonyx  
 MN817457\_ET\_melanonyx  
 MN817456\_ET\_melanonyx  
 MN817455\_ET\_melanonyx  
 MH297516\_ET\_melanonyx  
 MH297514\_ET\_melanonyx  
 MH297513\_ET\_melanonyx  
 MH297515\_ET\_melanonyx  
 AJ698899\_CD\_sikapusi  
 MN817430\_KakamegaKE\_ansorgei  
 KC953390\_BugalaUG\_sikapusi  
 MN817450\_ET\_brunneus  
 MN817452\_ET\_flavopunctatus  
 MN817451\_ET\_flavopunctatus  
 MN817431\_ET\_brunneus  
 MN817434\_ET\_brunneus  
 MN817432\_ET\_brunneus  
 MN817433\_ET\_brunneus  
 MH297518\_ET\_brevicaudus  
 MH297519\_ET\_brevicaudus  
 MN817435\_ET\_flavopunctatus  
 KE20151374\_MtKenyaKE\_zena  
 FMNH149536\_EpuluCD\_dudui  
 FMNH181191\_MulanjeMW\_machangui  
 FMNH155592\_UdzungwaTZ\_machangui  
 MN817467\_ET\_simensis  
 MN817470\_ET\_simensis  
 MN817445\_ET\_simensis  
 MN817444\_ET\_simensis  
 MN817443\_ET\_simensis  
 MH297511\_ET\_simensis  
 FMNH231291\_KakamegaKE\_zena  
 FMNH230997\_LoitaKE\_zena  
 FMNH230993\_LoitaKE\_zena  
 KE20150308\_MtKenyaKE\_zena  
 KE20150756\_MtKenyaKE\_zena  
 FMNH231300\_KakamegaKE\_zena  
 FMNH231285\_KakamegaKE\_zena  
 FMNH147301\_UsambaraTZ\_kilonzoi  
 FMNH166931\_UkaguruTZ\_kilonzoi  
 FMNH197830\_RubehoTZ\_kilonzoi  
 FMNH166926\_UkaguruTZ\_kilonzoi  
 FMNH153954\_SPareTZ\_kilonzoi  
 FMNH158356\_UluguruTZ\_kilonzoi  
 FMNH168333\_NguruTZ\_kilonzoi  
 FMNH147302\_UsambaraTZ\_kilonzoi  
 FMNH150193\_UsambaraTZ\_kilonzoi  
 FMNH158360\_UluguruTZ\_kilonzoi  
 FMNH158359\_UluguruTZ\_kilonzoi  
 FMNH161273\_NguruTZ\_kilonzoi  
 FMNH168193\_NguruTZ\_kilonzoi  
 FMNH166930\_UkaguruTZ\_kilonzoi  
 FMNH166929\_UkaguruTZ\_kilonzoi  
 KE20150951\_MtKenyaKE\_zena  
 KE20151354\_MtKenyaKE\_zena  
 KE20150393\_MtKenyaKE\_zena  
 FMNH204688\_LivingstoneTZ\_machangui  
 FMNH149544b\_IturiCD\_dudui  
 KE20150506\_MtKenyaKE\_zena  
 KE20150611\_MtKenyaKE\_zena  
 FMNH227728\_MtKahuziCD\_cinereus  
 FMNH192960\_MinziroTZ\_stanleyi  
 FMNH232206\_MorungoleUG\_stanleyi  
 FMNH231303\_KakamegaKE\_zena  
 FMNH155580\_UdzungwaTZ\_machangui  
 FMNH181184\_MulanjeMW\_machangui  
 FMNH205159\_BujingijilaTZ\_machangui  
 KE20151145\_MtKenyaKE\_zena  
 MH297508\_ET\_menageshae  
 KE20150673\_MtKenyaKE\_zena  
 KE20151519\_MtKenyaKE\_zena  
 FMNH177904\_MahaleTZ\_sabuni  
 FMNH171399\_MbiziTZ\_sabuni  
 MH297509\_ET\_simensis  
 KE20150428\_MtKenyaKE\_zena  
 KC953391\_AberdaresKE\_zena  
 KE20150572\_MtKenyaKE\_zena  
 KE20150607\_MtKenyaKE\_zena  
 KE20150387\_MtKenyaKE\_zena  
 KE20151398\_MtKenyaKE\_zena  
 MN817468\_ET\_simensis  
 FMNH227723\_MtKahuziCD\_cinereus  
 FMNH227712\_MtKahuziCD\_cinereus  
 FMNH230999\_LoitaKE\_zena  
 FMNH171382\_MbiziTZ\_sabuni  
 FMNH211553\_NyikaMW\_machangui  
 FMNH149544\_IturiCD\_dudui  
 KE20151800\_MtKenyaKE\_zena  
 KE20150950\_MtKenyaKE\_zena  
 KE20150732\_MtKenyaKE\_zena  
 MN817436\_ET\_pseudosikapusi  
 MN817437\_ET\_pseudosikapusi  
 MH297510\_ET\_simensis  
 KE20150095\_MtKenyaKE\_zena  
 MH297507\_ET\_menageshae  
 FMNH177907\_MahaleTZ\_sabuni  
 FMNH177905\_MahaleTZ\_sabuni  
 FMNH177902\_MahaleTZ\_sabuni  
 KE20150139\_MtKenyaKE\_zena  
 KE20150762\_MtKenyaKE\_zena  
 FMNH171374\_MbiziTZ\_sabuni  
 FMNH177704\_UdzungwaTZ\_machangui  
 FMNH195094\_MizimuCD\_cinereus  
 MH297512\_ET\_simensis  
 MN817447\_ET\_simensis  
 MN817446\_ET\_simensis  
 MN817448\_ET\_simensis  
 KE20151644\_MtKenyaKE\_zena  
 FMNH171397\_MbiziTZ\_sabuni  
 FMNH225073\_LuwungaUG\_stanleyi  
 AY326091\_ET\_flavopunctatus  
 FMNH155575\_UdzungwaTZ\_machangui  
 FMNH168109\_KituloTZ\_machangui  
 FMNH168110\_KituloTZ\_machangui  
 KE20151479\_MtKenyaKE\_zena  
 FMNH137783\_BugalaUG\_stanleyi  
 FMNHSS208\_ImatongSS\_stanleyi  
 FMNH232419\_AgoroAguUG\_stanleyi  
 FMNHSS196\_ImatongSS\_stanleyi  
 FMNHSS080\_ImatongSS\_stanleyi  
 FMNH232417\_AgoroAguUG\_stanleyi  
 FMNHSS271\_ImatongSS\_stanleyi  
 FMNH215102\_BuhangaRW\_stanleyi  
 KE20151786\_MtKenyaKE\_zena  
 MN817464\_ETH1346\_simensis  
 MN817465\_ET\_simensis  
 MN817460\_ET\_simensis  
 MN817462\_ET\_simensis  
 MN817461\_ET\_simensis  
 MN817463\_ET\_simensis  
 FMNH155594\_UdzungwaTZ\_machangui  
 FMNH204689\_LivingstoneTZ\_machangui  
 MN817469\_ET\_simensis  
 KE20150904\_MtKenyaKE\_zena  
 MN817459\_ET\_chercherensis  
 MN817458\_ET\_chercherensis  
 MN817440\_ET\_chercherensis  
 MN817439\_ET\_chercherensis  
 MN817438\_ET\_chercherensis  
 FMNH171400\_MbiziTZ\_sabuni  
 KE20151017\_MtKenyaKE\_zena  
 KE20150188\_MtKenyaKE\_zena  
 KE20150001\_MtKenyaKE\_zena  
 KE20151305\_MtKenyaKE\_zena  
 KE20151603\_MtKenyaKE\_zena  
 KE20151855\_MtKenyaKE\_zena  
 KE20151117\_MtKenyaKE\_zena  
 KE20151848\_MtKenyaKE\_zena  
 KE20151161\_MtKenyaKE\_zena  
 KE20151278\_MtKenyaKE\_zena  
 KE20150861\_MtKenyaKE\_zena  
 FMNH210704\_ManyaraTZ\_makundi  
 FMNH210924\_ManyaraTZ\_makundi  
 FMNH210698\_ManyaraTZ\_makundi  
 FMNH210926\_ManyaraTZ\_makundi  
 FMNH211161\_NgorongoroTZ\_makundi  
 FMNH211172\_NgorongoroTZ\_makundi  
 FMNH211169\_NgorongoroTZ\_makundi  
 FMNH174239\_KilimanjaroTZ\_aquilus  
 FMNH208098\_MeruTZ\_verhageni  
 FMNH174237\_KilimanjaroTZ\_aquilus  
 FMNH208485\_MeruTZ\_verhageni  
 FMNH174242\_KilimanjaroTZ\_aquilus  
 FMNH174244\_KilimanjaroTZ\_aquilus  
 FMNH174225\_KilimanjaroTZ\_aquilus

**Fig. S5** Haplotype network structure in selected non-Ethiopian *L. flavopunctatus* members inferred from *Cytochrome b* using the Median Joining Network algorithm in PopART. The networks show genealogical relationships between sampling locality in the *L. zena*, *L. machangui*, and *L. stanleyi* clades which were selected for being sampled from more localities. The number of base substitutions between haplotypes are shown as hatchmarks on branches. The node sizes correspond to the haplotype frequency (number of samples per haplotypes) and branch lengths are relative to the number of mutations between haplotypes.

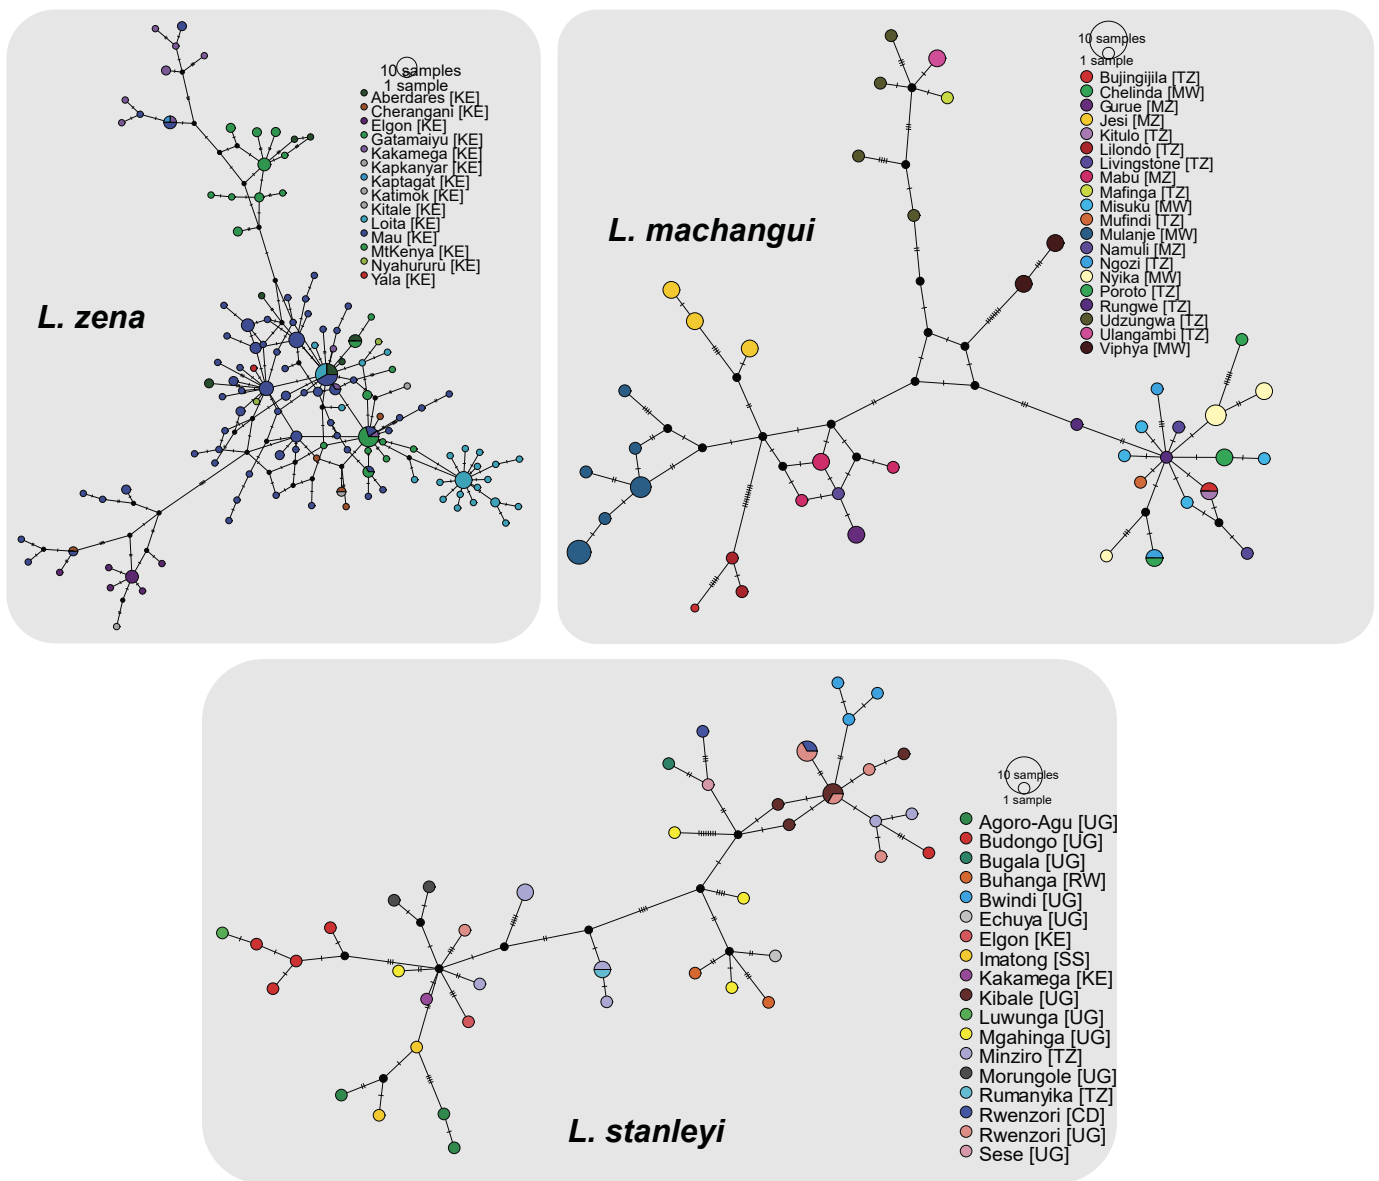

**Fig. S6** Time calibrated maximum clade credibility tree of evolutionary relationships and divergence times of the non-Ethiopian *L. flavopunctatus* members reconstructed from concatenated alignments of *Cytochrome b* (*CYTB*), *cytochrome oxidase subunit 1*, and *Interphotoreceptor retinoid binding protein*, time-calibrated using most recent common ancestor ages. Branch labels show the posterior probability support values and node bars show the highest posterior density interval. The corresponding gene trees are also presented to illustrate the phylogenetic informativeness of the individual genes. Here it is apparent that only the *CYTB* topology offer a reliable outlook of the phylogenetic associations between the non-Ethiopian *L. flavopunctatus* members.

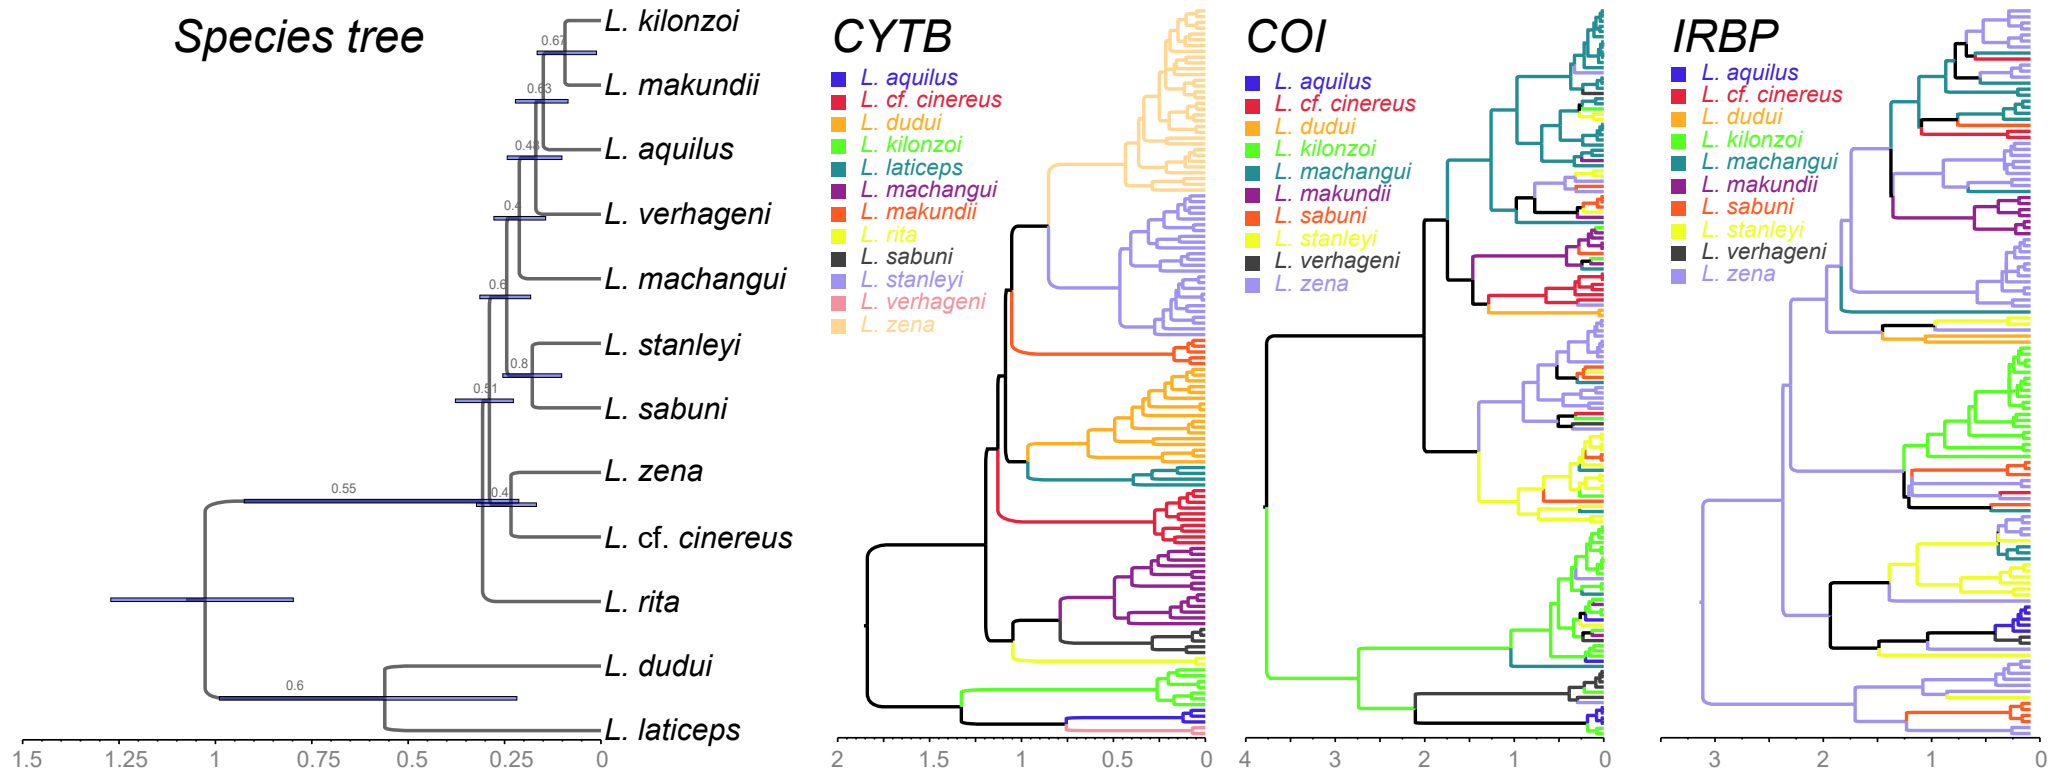

**Fig. S7** Classification results following discriminant analysis in using linear and geometric craniodental datasets of the non-Ethiopian *L. flavopunctatus* members. Values indicate cross-validated (leave-one-out bootstrapping) percentage success by which samples were classified into a priori and predicted species groups. The shaded diagonal values indicate the success by which samples were predicted into their own groups which correspond to distinct *Cytochrome b* clades. N = number of samples. See **Fig. 6** in main manuscript for stratified species classification results.

| Dataset   | Species                  | 1    | 2    | 3    | 4    | 5    | 6    | 7    | 8    | 9    | 10   | 11   | N   |
|-----------|--------------------------|------|------|------|------|------|------|------|------|------|------|------|-----|
| Linear    | 1 <i>L. aquilus</i>      | 92.3 | 0.0  | 0.0  | 0.0  | 0.0  | 0.0  | 0.0  | 0.0  | 0.0  | 7.7  | 0.0  | 13  |
|           | 2 <i>L. cf. cinereus</i> | 4.9  | 47.5 | 3.3  | 8.2  | 18.0 | 4.9  | 4.9  | 0.0  | 6.6  | 1.6  | 0.0  | 61  |
|           | 3 <i>L. dudui</i>        | 0.0  | 13.8 | 55.2 | 3.4  | 17.2 | 0.0  | 0.0  | 0.0  | 6.9  | 0.0  | 3.4  | 29  |
|           | 4 <i>L. kilonzoii</i>    | 1.4  | 12.2 | 2.7  | 35.1 | 14.9 | 12.2 | 4.1  | 0.0  | 9.5  | 2.7  | 5.4  | 74  |
|           | 5 <i>L. laticeps</i>     | 0.0  | 23.1 | 3.8  | 11.5 | 38.5 | 3.8  | 0.0  | 3.8  | 15.4 | 0.0  | 0.0  | 26  |
|           | 6 <i>L. machangui</i>    | 1.2  | 4.7  | 4.7  | 11.8 | 1.2  | 52.9 | 0.0  | 9.4  | 4.7  | 1.2  | 8.2  | 85  |
|           | 7 <i>L. makundii</i>     | 0.0  | 3.3  | 0.0  | 0.0  | 0.0  | 0.0  | 83.3 | 0.0  | 6.7  | 0.0  | 6.7  | 30  |
|           | 8 <i>L. sabuni</i>       | 0.0  | 0.0  | 0.0  | 9.1  | 0.0  | 9.1  | 0.0  | 77.3 | 0.0  | 0.0  | 4.5  | 22  |
|           | 9 <i>L. stanleyi</i>     | 1.4  | 11.8 | 11.4 | 10.0 | 11.4 | 5.7  | 7.1  | 1.4  | 29.9 | 0.5  | 9.5  | 211 |
|           | 10 <i>L. verhageni</i>   | 0.0  | 0.0  | 0.0  | 0.0  | 0.0  | 0.0  | 5.9  | 0.0  | 0.0  | 94.1 | 0.0  | 17  |
|           | 11 <i>L. zena</i>        | 1.3  | 2.5  | 10.8 | 5.7  | 6.4  | 12.1 | 19.1 | 5.7  | 7.6  | 2.5  | 26.1 | 157 |
| Geometric | 1 <i>L. aquilus</i>      | 100  | 0    | 0    | 0    | 0    | 0    | 0    | 0    | 0    | 0    | 0    | 13  |
|           | 2 <i>L. cf. cinereus</i> | 0    | 52.6 | 8.8  | 1.8  | 7    | 5.3  | 5.3  | 0    | 17.5 | 0    | 1.8  | 57  |
|           | 3 <i>L. dudui</i>        | 0    | 20.7 | 55.2 | 0    | 6.9  | 0    | 0    | 3.4  | 13.8 | 0    | 0    | 29  |
|           | 4 <i>L. kilonzoii</i>    | 0    | 1.5  | 1.5  | 74.6 | 0    | 1.5  | 1.5  | 0    | 10.4 | 1.5  | 7.5  | 67  |
|           | 5 <i>L. laticeps</i>     | 0    | 14.3 | 9.5  | 4.8  | 42.9 | 0    | 0    | 4.8  | 14.3 | 0    | 9.5  | 21  |
|           | 6 <i>L. machangui</i>    | 2.5  | 0    | 2.5  | 5.1  | 0    | 75.9 | 1.3  | 6.3  | 2.5  | 1.3  | 2.5  | 79  |
|           | 7 <i>L. makundii</i>     | 0    | 0    | 3.6  | 3.6  | 0    | 0    | 82.1 | 0    | 0    | 0    | 10.7 | 28  |
|           | 8 <i>L. sabuni</i>       | 0    | 0    | 0    | 21.1 | 0    | 21.1 | 0    | 47.4 | 0    | 0    | 10.5 | 19  |
|           | 9 <i>L. stanleyi</i>     | 0    | 12.1 | 5.5  | 8.5  | 8    | 3.5  | 3    | 0.5  | 48.7 | 0.5  | 9.5  | 199 |
|           | 10 <i>L. verhageni</i>   | 0    | 6.7  | 0    | 0    | 0    | 0    | 0    | 6.7  | 0    | 80   | 6.7  | 15  |
|           | 11 <i>L. zena</i>        | 2.8  | 1.9  | 1.9  | 6.5  | 5.6  | 5.6  | 7.5  | 3.7  | 6.5  | 4.7  | 53.3 | 107 |

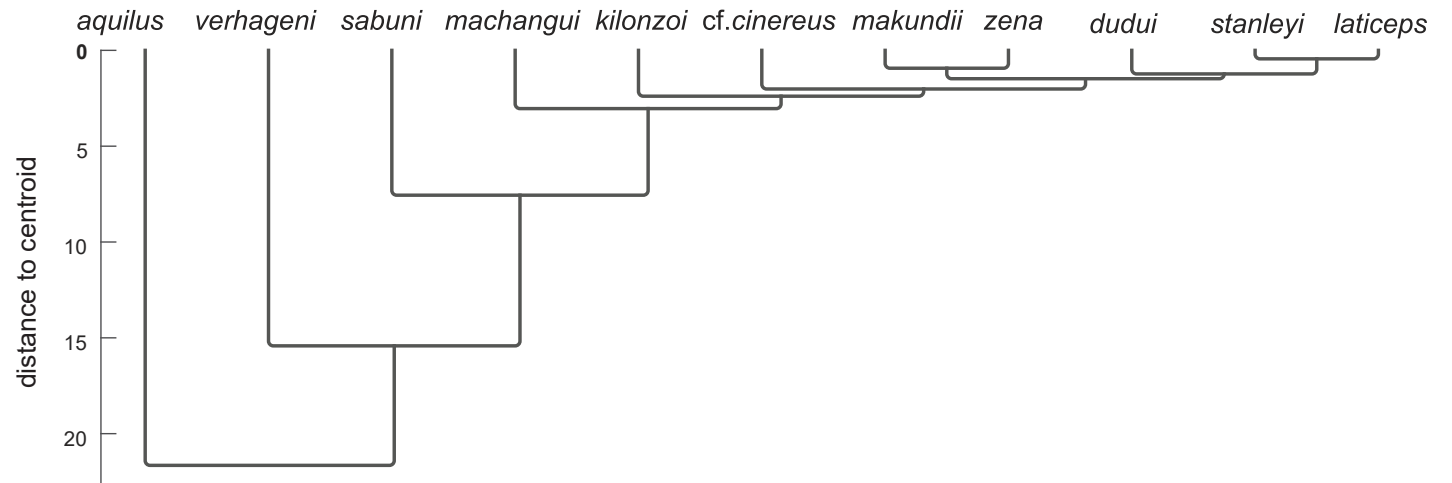

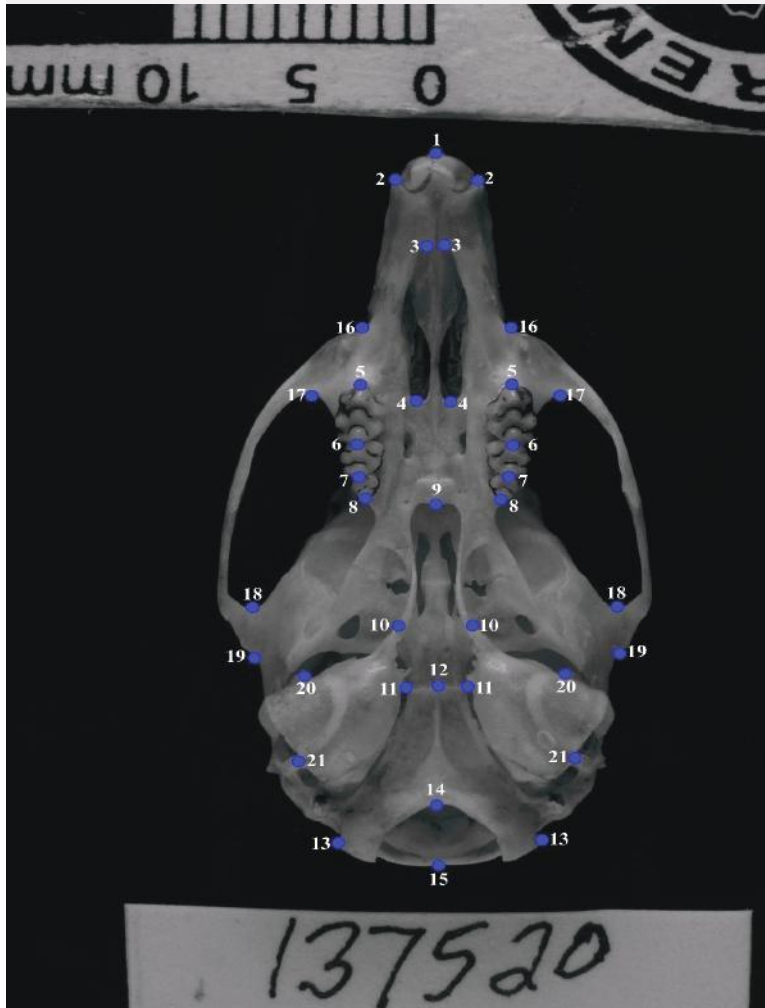

**Fig. S8** Cranial landmarks used in geometric morphometric analyses of the non-Ethiopian *L. flavopunctatus* members. 1, Anteriormost point between upper incisors; 2, Superiormost point of upper incisive alveolus; 3, Anterior most margin of the incisive foramen; 4, Posteriormost margin of incisive foramen; ; 5, Anterior most margin of the first molar; 6, Between first molar and second molar; 7, Between the second molar and third molar; 8, Posteriormost margin of the third molar; 9, Posterior most point of the palate; 10, midpoint on the auditory bulla where it meets the piriform fenestra posteriorly; 11, Medial point of the junction between tympanic bullae and Eustachian tube; 12, Midpoint of suture between basisphenoid and basioccipital; 13, Posteriormost margin of occipital condyle; 14, Anterior most point of the Foramen magnum viewed ventrally; 15, Posteriormost point of superior margin of foramen magnum; 16, Anteriormost margin of zygomatic plate; 17, Posteriormost margin of the posterior zygomatic plate; 18, Posteriormost margin of the anterior zygomatic plate; 19, Posterior most point of suture between jugal and squamosal; 20, Tip of the eustachian tube; 21, caudal end of the external opening of the auditory channel.



**Fig. S9** Principal component analysis (PCA) of linear measurements used in the study. The plots show how samples cluster based on the first and second component scores. The top left scatter plot shows samples do not cluster in a distinct pattern consistent with the taxonomic units currently acknowledged in literature (top right). The bottom left plot shows the variances accounted for by all the component loadings.

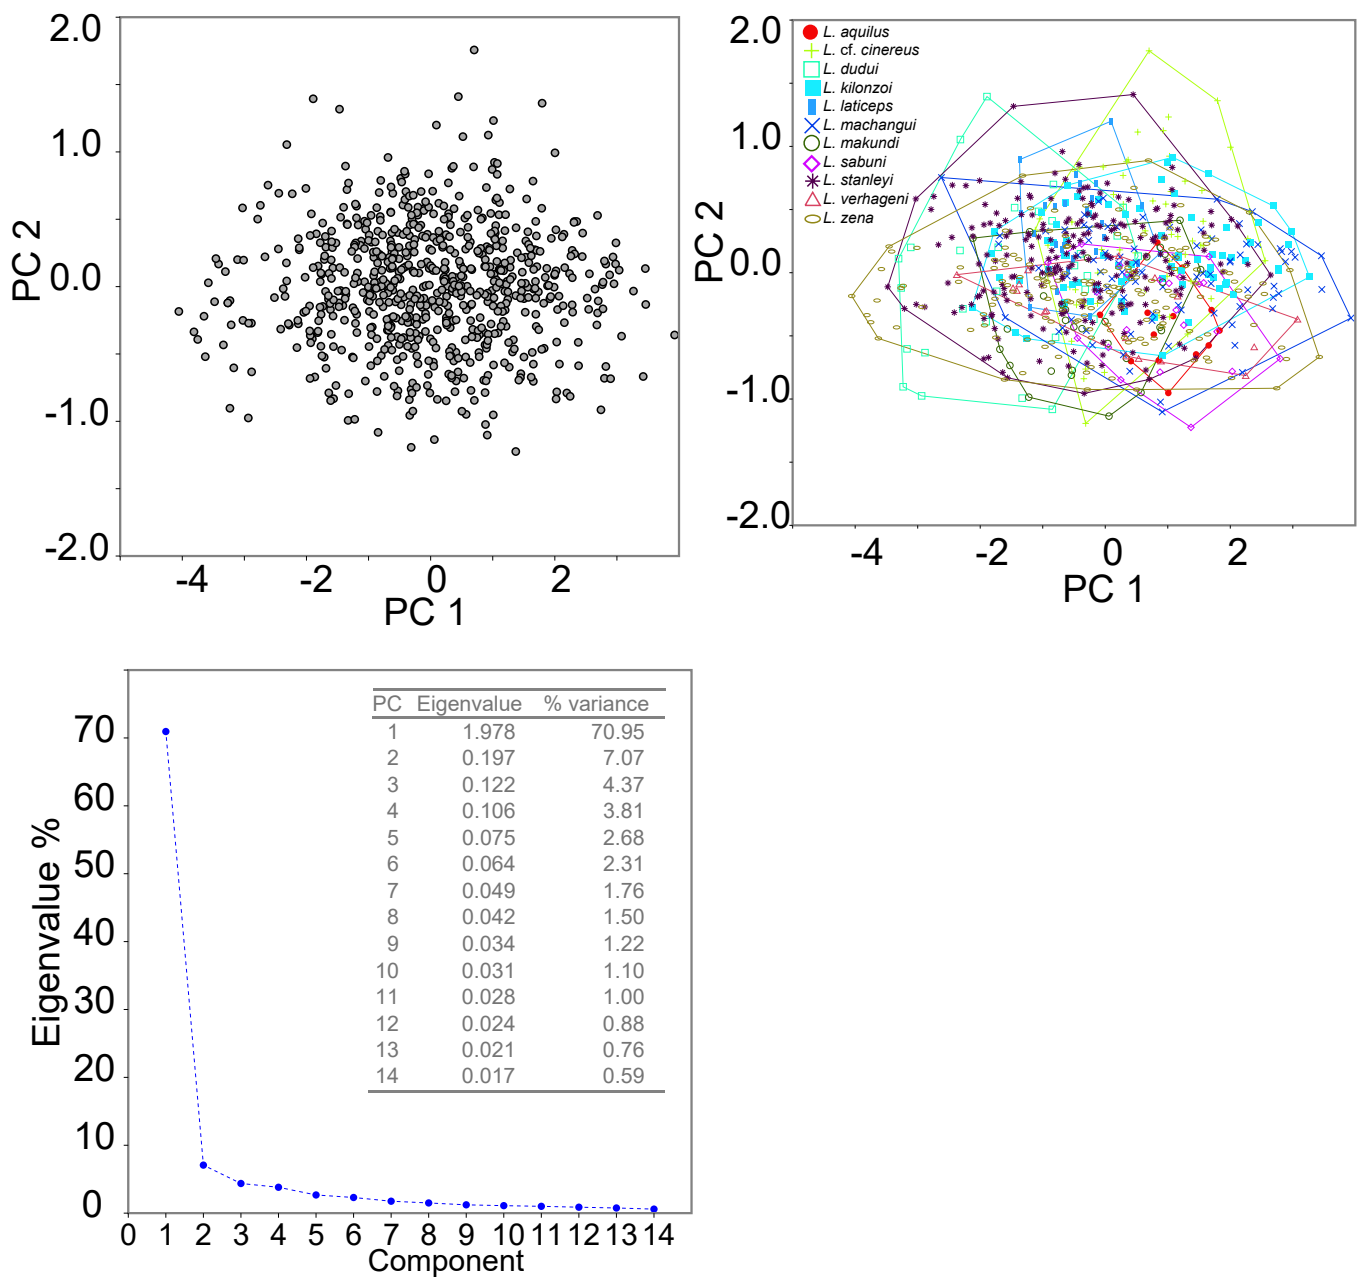

Supplement: 12862_2021_1813_MOESM1_ESM.pdf [file 12862_2021_1813_MOESM1_ESM.pdf]
